# Supplementary material for: Does the impact of a plant-based diet during pregnancy on birth weight differ by ethnicity? A dietary pattern analysis from a prospective Canadian birth cohort alliance
Source: PubMed Central journal article supplement — BMJ Open. 2017 Nov 14;7(11):e017753. doi: 10.1136/bmjopen-2017-017753 (PMC5695448; doi:10.1136/bmjopen-2017-017753), 2017-11-14

## Supplemental Digital Content

**eTable 1** - Food groups with a loading  $\geq |0.30|$  whose presence or absence characterize each of the three dietary patterns.

| Food Group             | Plant-based | Western | Health Conscious |
|------------------------|-------------|---------|------------------|
| Fats                   |             | 0.55    |                  |
| Full Fat Dairy         |             |         |                  |
| Low Fat Dairy          | 0.39        | 0.42    |                  |
| Fermented Dairy        | 0.61        |         |                  |
| Meat                   | (-0.35)     | 0.43    | 0.34             |
| Eggs                   |             |         | 0.36             |
| Organ Meats            |             |         |                  |
| Fish and Seafood       |             |         | 0.50             |
| Processed Meats        |             | 0.55    |                  |
| Meat Dishes            |             |         | 0.49             |
| Poultry and Waterfowl  |             |         | 0.36             |
| Fried Foods            |             |         |                  |
| Leafy Greens           |             |         | 0.38             |
| Cruciferous Vegetables |             |         | 0.56             |
| Legumes                | 0.62        |         |                  |
| Fresh Seasonings       | 0.72        |         |                  |
| Starchy Vegetables     |             | 0.43    |                  |
| Vegetable Medley       | 0.42        |         | 0.47             |
| Other Vegetables       | 0.70        |         | 0.32             |
| Tofu                   |             |         |                  |
| Fruits                 |             |         | 0.53             |
| Whole Grains           | 0.71        |         |                  |
| Refined Grains         |             |         | 0.35             |
| Pasta                  |             | 0.54    |                  |
| Pizza                  |             | 0.32    |                  |
| French Fries           |             | 0.47    |                  |
| Non-Meat Dishes        | 0.63        |         |                  |
| Stir-Fried Dishes      |             |         | 0.47             |
| Snacks                 |             | 0.42    |                  |
| Nuts and Seeds         |             |         | 0.34             |
| Sweets                 |             | 0.46    |                  |
| Condiments             |             | 0.47    | 0.41             |
| Tea                    | 0.56        |         |                  |
| Coffee                 |             | 0.34    |                  |
| Sweet Drinks           |             | 0.56    |                  |
| Artificial Sweeteners  |             |         |                  |
| Eigenvalue             | 4.05        | 3.18    | 3.06             |
| Cumulative Variation   | 0.11        | 0.20    | 0.29             |

<sup>1</sup>Proportion of the total dietary variation in the dataset that is explained by considering 1, 2, or 3 underlying dietary patterns.

**eTable 2**– Comparison of reported daily consumption frequencies (servings/d) of common food groups by White Caucasian and South Asian women, divided by 1st and 4th quartile.

| Food                             | Plant-Based Diet Adherence |            |             |            | White Caucasian vs South Asian |            |
|----------------------------------|----------------------------|------------|-------------|------------|--------------------------------|------------|
|                                  | White Caucasian            |            | South Asian |            | Quartile 1                     | Quartile 4 |
|                                  | Quartile 1                 | Quartile 4 | Quartile 1  | Quartile 4 |                                |            |
| Dairy                            | 3.4 (2.6)                  | 3.9 (2.1)  | 2.5 (1.7)   | 3.3 (2.3)* | 0.306                          | <0.001     |
| Eggs                             | 0.1 (0.1)                  | 0.3 (0.3)* | 0.6 (0.6)   | 0.2 (0.3)* | <0.001                         | 0.002      |
| Fish                             | 0.1 (0.1)                  | 0.2 (0.2)* | 0.1 (0.3)   | 0.0 (0.1)* | 0.03                           | <0.001     |
| Poultry                          | 0.3 (0.2)                  | 0.2 (0.2)  | 0.3 (0.3)   | 0.1 (0.2)* | 0.948                          | <0.001     |
| Red Meat                         | 0.6 (0.3)                  | 0.4 (0.2)* | 0.4 (0.4)   | 0.0 (0.1)* | 0.013                          | <0.001     |
| Breads and Rice                  | 2.7 (2.7)                  | 1.9 (1.1)  | 3.0 (3.3)   | 3.8 (1.5)* | 0.73                           | <0.001     |
| Legumes                          | 0.1 (0.1)                  | 0.2 (0.2)* | 0.4 (0.4)   | 0.8 (0.7)* | <0.001                         | <0.001     |
| Fruit                            | 2.5 (2.5)                  | 2.6 (1.5)  | 2.5 (2.4)   | 2.1 (1.4)* | 0.97                           | <0.001     |
| Raw Vegetables                   | 0.8 (0.8)                  | 1.3 (0.9)  | 1.4 (4.2)   | 2.7 (1.6)* | 0.10                           | <0.001     |
| Cooked Vegetables                | 1.3 (0.9)                  | 2.3 (1.3)* | 2.2 (1.5)   | 4.3 (2.2)* | 0.01                           | <0.001     |
| Fried Foods                      | 1.2 (1.0)                  | 0.2 (0.2)  | 0.4 (0.4)   | 0.2 (0.2)* | 0.02                           | 0.421      |
| Nuts and Seeds                   | 0.4 (0.5)                  | 0.6 (0.6)* | 0.3 (0.6)   | 0.2 (0.3)* | 0.57                           | <0.001     |
| Convenience Foods                | 1.7 (0.8)                  | 1.3 (0.9)  | 0.3 (0.7)   | 0.2 (0.4)* | <0.001                         | <0.001     |
| Sweet Drinks                     | 4.3 (2.5)                  | 2.2 (1.7)* | 0.8 (1.0)   | 0.5 (0.7)* | <0.00                          | <0.001     |
| Sweets                           | 2.2 (1.7)                  | 2.1 (1.5)  | 1.4 (1.3)   | 1.1 (0.9)  | 0.15                           | <0.001     |
| Multivitamin (%)                 | 94.0%                      | 79.3%*     | 66.3%       | 78.1%*     | <0.001                         | 0.72       |
| Married (%)                      | 93.0%                      | 95.8%*     | 100.0%      | 100.0%     | <0.001                         | 0.002      |
| Years in Canada (yrs)            | 28.8 (7.4)                 | 29.5 (8.8) | 11.3 (10.3) | 7.0 (5.5)* | <0.001                         | <0.001     |
| Adults living in household (n)   | 2.2 (0.6)                  | 2.1 (0.7)  | 3.0 (1.5)   | 3.5 (1.7)* | <0.001                         | <0.001     |
| Any Post-Secondary Education (%) | 74.1%                      | 93.4%*     | 87.3%       | 75.4%*     | <0.001                         | <0.001     |
| Currently Employed (%)           | 80.2%                      | 88.2%*     | 55.1%       | 53.7%      | <0.001                         | <0.001     |
| Household Income ≥ \$ 60K/yr (%) | 85.5%                      | 88.6%      | 55.9%       | 33.5%*     | <0.001                         | <0.001     |

Consumption of foods were compared using t-tests. Data are reported as mean servings per day and standard deviation. Quartiles are in white Caucasians (n=2367) and South Asians (n=884). \*p<0.05 between Q1 vs Q4.

**eTable 3**— Multivariable regression in South Asians (n=884) of the role of ‘cooked vegetables’ in the association between the plant-based diet pattern and birthweight.

| Variables                 | With Plant-based diet |         | Without Plant-based diet |         |
|---------------------------|-----------------------|---------|--------------------------|---------|
|                           | $\beta$               | P value | $\beta$                  | P value |
| Intercept                 | -4188.2               | <0.001  | -4136.4                  | <0.001  |
| Pre-Pregnancy Weight (kg) | 5.1                   | <0.001  | 5.1                      | <0.001  |
| Maternal Height (cm)      | 5.9                   | 0.007   | 5.9                      | 0.008   |
| Parity (# of children)    | 44.1                  | 0.009   | 46.2                     | 0.006   |
| Gestational age (wks)     | 154.5                 | <0.001  | 154.8                    | <0.001  |
| Infant Sex (Female = 1)   | -93.9                 | <0.001  | -93.5                    | <0.001  |
| Plant-Based               | 37.9                  | 0.041   | ns                       | ns      |
| Cooked Vegetables         | 7.4                   | 0.376   | 15.6                     | 0.034   |

The same covariates were included for each ethnic-specific model but non-significant covariates (e.g., ‘smoking’ in South Asians) were removed in the final model (denoted as ‘ns’). Parity was reported as having 0, 1, 2, 3, 4, 5, or 6 (or more) children. The consumption of ‘cooked vegetables’ includes all vegetables asked within the food frequency questionnaire that were not stated as ‘raw’. The consumption of ‘cooked vegetables’ includes all vegetables asked within the food frequency questionnaire that were not stated as ‘raw’.

eFigure 1 – Schema of participant inclusion and exclusion

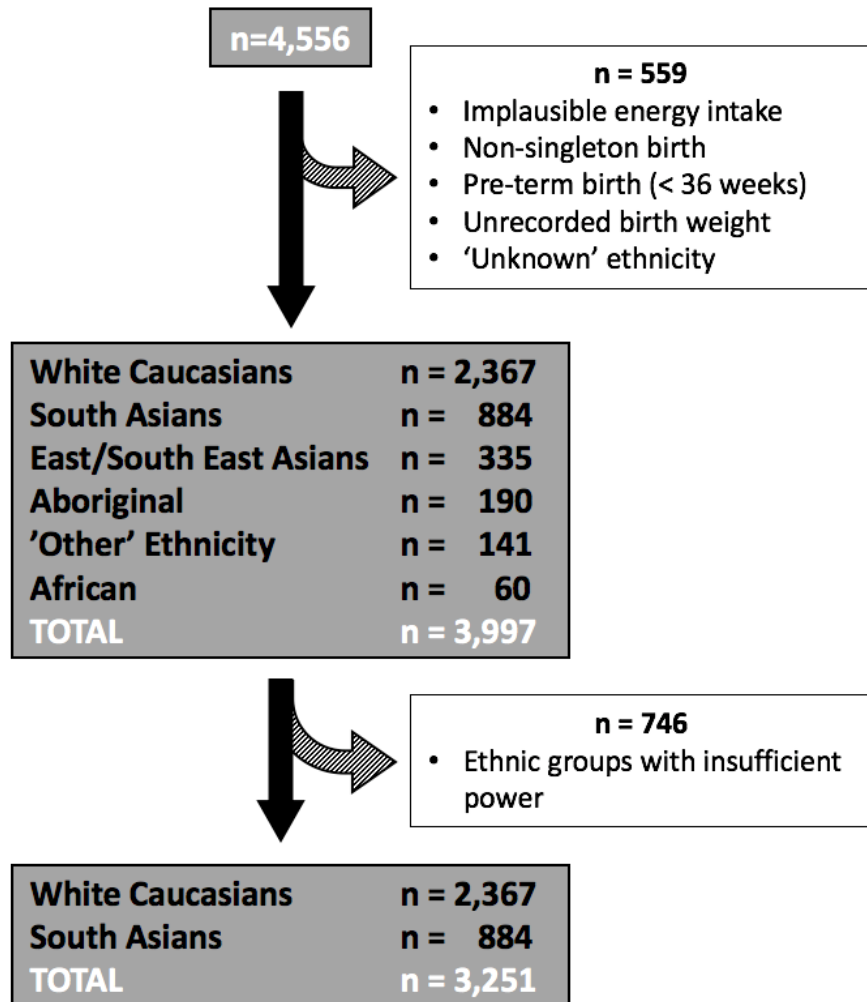

Supplement: bmjopen-2017-017753supp001.pdf [file bmjopen-2017-017753supp001.pdf]
